# Supplementary material
Source: HighWire-hosted journal article supplement (https://erj.ersjournals.com/content/54/6/1900585)
Supplement: inline-supplementary-material-2 [file inline-supplementary-material-2.pdf]

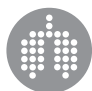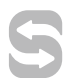

SHAREABLE PDF

# Clinical phenotypes and outcomes of precapillary pulmonary hypertension of sickle cell disease

Laurent Savale <sup>1,2,3</sup>, Anoosha Habibi<sup>4,5</sup>, François Lionnet<sup>6</sup>, Bernard Maitre <sup>7</sup>, Vincent Cottin <sup>8</sup>, Xavier Jais<sup>1,2,3</sup>, Ari Chaouat <sup>9,10</sup>, Elise Artaud-Macari<sup>11</sup>, Matthieu Canuet <sup>12</sup>, Grégoire Prevot<sup>13</sup>, Christelle Chantalat-Augier<sup>14</sup>, David Montani <sup>1,2,3</sup>, Olivier Sitbon <sup>1,2,3</sup>, Frédéric Galacteros<sup>4,5</sup>, Gérald Simonneau<sup>1,2,3</sup>, Florence Parent<sup>1,2,3</sup>, Pablo Bartolucci <sup>4,5</sup> and Marc Humbert <sup>1,2,3</sup>

**Affiliations:** <sup>1</sup>Univ. Paris-Sud, Faculté de Médecine, Université Paris-Saclay, Le Kremlin-Bicêtre, France. <sup>2</sup>AP-HP, Service de Pneumologie, Centre de Référence de l'Hypertension Pulmonaire, Hôpital Bicêtre, Le Kremlin-Bicêtre, France. <sup>3</sup>INSERM UMR\_S 999, Hôpital Marie Lannelongue, Le Plessis Robinson, France. <sup>4</sup>APHP, Hôpitaux Universitaire Henri Mondor, Unité des Maladies Génétiques du Globule Rouge, Centre de Référence des Pathologies du Globule Rouge, Créteil, France. <sup>5</sup>UPEC, Institut Mondor de Recherche Biomédicale (IMRB), Institut National de la Santé et de la Recherche Médicale (INSERM) U955, DHU A-TVB, Créteil, France. <sup>6</sup>AP-HP, Service de Médecine Interne, Hôpital Tenon, Paris, France. <sup>7</sup>AP-HP, Hôpitaux Universitaires Henri Mondor, Unité de Pneumologie, Créteil, France. <sup>8</sup>Université Claude-Bernard Lyon 1, Hôpital Louis-Pradel, Service de Pneumologie, Centre de Référence National des Maladies Pulmonaires Rares, UMR154, Lyon, France. <sup>9</sup>Département de Pneumologie, CHRU de Nancy, rue du Morvan, Vandœuvre-lès-Nancy, France. <sup>10</sup>INSERM U1116, Université de Lorraine, Nancy, France. <sup>11</sup>Pneumology Dept, Rouen University Hospital, Rouen, France. <sup>12</sup>Service de Pneumologie, Nouvel Hôpital Civil, Hôpitaux Universitaires de Strasbourg, Strasbourg, France. <sup>13</sup>Service de Pneumologie, Hôpital Larrey, Toulouse, France. <sup>14</sup>AP-HP, Service de Médecine Interne, Hôpital Bicêtre, Le Kremlin-Bicêtre, France.

**Correspondence:** Laurent Savale, Université Paris-Sud, Centre de Référence de l'Hypertension Pulmonaire, Service de Pneumologie et Soins Intensifs Respiratoires, Hôpital Bicêtre, 78, rue du Général Leclerc, 94270 Le Kremlin-Bicêtre, France. E-mail: laurent.savale@daphp.fr

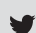

@ERSpublications

**Clinical phenotype of precapillary pulmonary hypertension of sickle cell disease is influenced by the genotype. Thrombotic lesions appear as a major component of PH related to SCD, more frequently in SC patients.** <http://bit.ly/32b2nEx>

**Cite this article as:** Savale L, Habibi A, Lionnet F, *et al.* Clinical phenotypes and outcomes of precapillary pulmonary hypertension of sickle cell disease. *Eur Respir J* 2019; 54: 1900585 [<https://doi.org/10.1183/13993003.00585-2019>].

This single-page version can be shared freely online.

## ABSTRACT

**Rationale:** Precapillary pulmonary hypertension (PH) is a devastating complication of sickle cell disease (SCD). Little is known about the influence of the SCD genotype on PH characteristics.

**Objectives:** To describe clinical phenotypes and outcomes of precapillary PH due to SCD according to disease genotype.

**Methods:** A nationwide multicentre retrospective study including all patients with SCD-related precapillary PH from the French PH Registry was conducted. Clinical characteristics and outcomes according to SCD genotype were analysed.

**Results:** 58 consecutive SCD patients with precapillary PH were identified, of whom 41 had homozygous for haemoglobin S (SS) SCD, three had S- $\beta_0$  thalassaemia (S- $\beta_0$  thal) and 14 had haemoglobin SC disease

(SC). Compared to SC patients, SS/S- $\beta_0$  thal patients were characterised by lower 6-min walk distance ( $p=0.01$ ) and lower pulmonary vascular resistance ( $p=0.04$ ). Mismatched segmental perfusion defects on lung scintigraphy were detected in 85% of SC patients and 9% of SS/S- $\beta_0$  thal patients, respectively, and 50% of SS/S- $\beta_0$  thal patients had heterogeneous lung perfusion without segmental defects. After PH diagnosis, 31 patients (53%) received medical therapies approved for pulmonary arterial hypertension, and chronic red blood cell exchange was initiated in 23 patients (40%). Four patients were managed for chronic thromboembolic PH by pulmonary endarterectomy ( $n=1$ ) or balloon pulmonary angioplasty ( $n=3$ ). Overall survival was 91%, 80% and 60% at 1, 3 and 5 years, respectively, without influence of genotype on prognosis.

**Conclusions:** Patients with precapillary PH related to SCD have a poor prognosis. Thrombotic lesions appear as a major component of PH related to SCD, more frequently in SC patients.
